# Supplementary material
Source: PubMed Central journal article supplement (PMC4658883)
Supplement: ijcem0008-15108-f6.pdf [file ijcem0008-15108-f6.pdf]

## HBx represses let-7 via Lin28B

**Table S1.** Sequences of RNA and DNA Oligonucleotides

| Name                       | Sense Strand (5'-3')          | Antisense Strand (5'-3')      |
|----------------------------|-------------------------------|-------------------------------|
| <b>siRNA Duplexes</b>      |                               |                               |
| si-Lin28B-1                | GGAAGGAUUUAGAAGCCUATT         | UAGGCUUCUAAAUCCUUCCTT         |
| si-Lin28B-2                | GCAGAGAUCUCAGAACGGUTT         | ACCGUUCUGAGAUCUCUGCTT         |
| si-c-Myc-1                 | GGUCAGAGUCUGGAUCACCdTdT       | GGUGAUCCAGACUCUGACCdTdT       |
| si-c-Myc-2                 | AACCACAGAAACAACATCGATCCTGTCTC | AAATCGATGTTGTTTCTGTGGCCTGTCTC |
| NC                         | UCACAACCUCCUAGAAGAGUAGA       | UACUCUUUCUAGGAGGUUGUUUUU      |
| Name                       | Sense Primer (5'-3')          | Antisense Primer (5'-3')      |
| <b>Primers for qRT-PCR</b> |                               |                               |
| c-Myc                      | GCAGCTGCTTAGACGCTGGA          | CGCAGTAGAAATACGGCTGCAC        |
| Lin28B                     | GCCCCTTGATATTCCAGTC           | TGACTCAAGGCCTTTGGAAG          |
| GAPDH                      | ATCACCATCTCCAGGAGCGA          | CCTTCTCCATGGTGGTGAAGAC        |
